# Supplementary material for: A BiVO4/UU-200 heterojunction for efficient visible-light photocatalytic degradation of rhodamine B
Source: Royal Society of Chemistry journal article supplement (doi:10.1039/d6na00104a), 2026-04-17
Supplement: d6na00104a1.pdf [file d6na00104a1.pdf]

Support information

## **A BiVO<sub>4</sub>/UU-200 Heterojunction for Efficient Visible-Light Photocatalytic Degradation of Rhodamine B**

Hoang Ai Le Pham<sup>1</sup>, Huu Vinh Nguyen<sup>2</sup>, Huy Anh Bui<sup>1</sup>, Van Cuong Nguyen<sup>1</sup>, and Thi Hong Anh Nguyen<sup>3,\*</sup>

<sup>1</sup>Faculty of Chemical Engineering, Industrial University of Ho Chi Minh City, No. 12 Nguyen Van Bao, Hanh Thong Ward, Ho Chi Minh City, Viet Nam.

<sup>2</sup>Institute of Applied Technology and Sustainable Development, Nguyen Tat Thanh University, Ho Chi Minh City, Viet Nam

<sup>3</sup>Faculty of Chemical Engineering, Ho Chi Minh City University of Industry and Trade, 140 Le Trong Tan Street, Tay Thanh Ward, Ho Chi Minh City 70000, Vietnam.

\* Corresponding authors: Associate Professor Thi Hong Anh Nguyen, PhD

Email: [anhnth@huit.edu.vn](mailto:anhnth@huit.edu.vn)

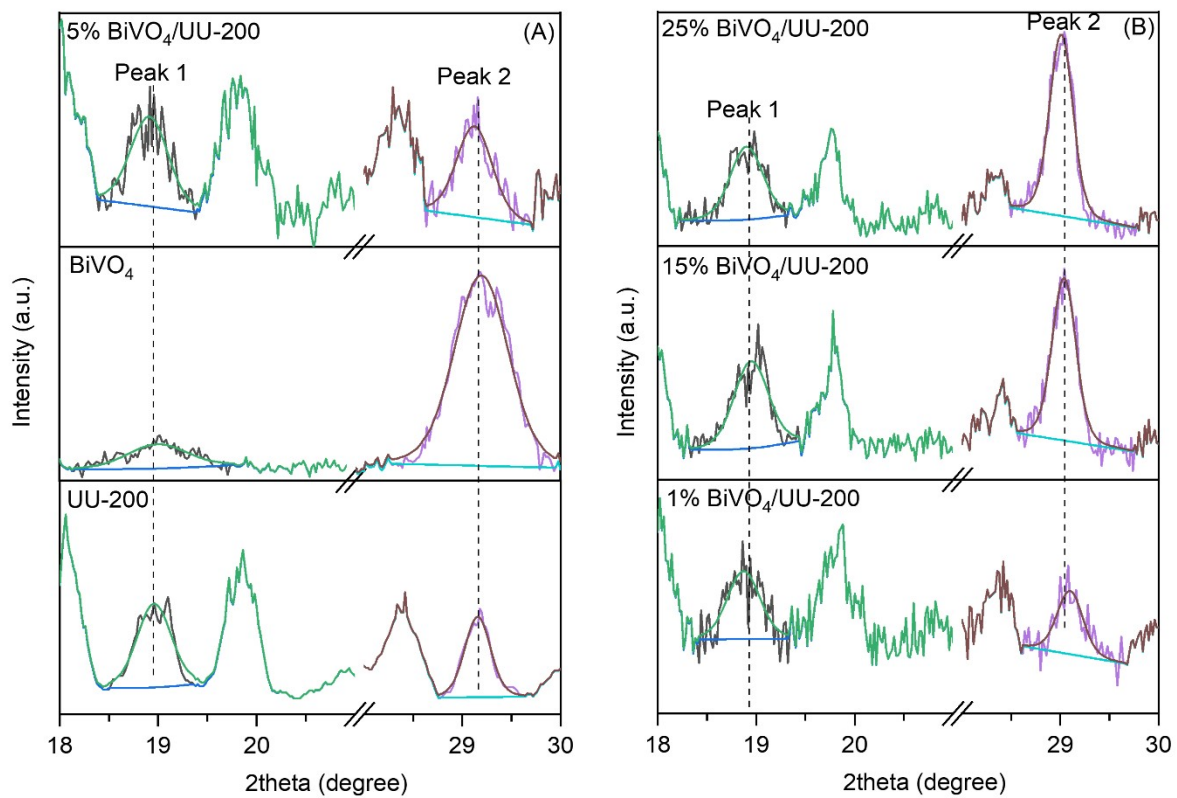

Figure S1. The magnified part of XRD data from 18° to 30° and the deconvolution of the XRD data

Table S1: The weight crystalline fractions of the prepared materials

| Samples                       |                   | Peak   |        | Peak2/Peak1 |
|-------------------------------|-------------------|--------|--------|-------------|
|                               |                   | 1      | 2      | ratio       |
| UU-200                        | Position (degree) | 18.96  | 29.16  |             |
|                               | Area              | 20.040 | 14.536 | 0.725       |
|                               | FWHM              | 0.414  | 0.311  |             |
| BiVO <sub>4</sub>             | Position (degree) | 19.16  | 29.23  |             |
|                               | Area              | 13.043 | 91.878 | 7.044       |
|                               | FWHM              | 0.697  | 0.624  |             |
| 1% BiVO <sub>4</sub> /UU-200  | Position (degree) | 18.87  | 29.10  |             |
|                               | Area              | 32.232 | 23.722 | 0.736       |
|                               | FWHM              | 0.392  | 0.310  |             |
| 5% BiVO <sub>4</sub> /UU-200  | Position (degree) | 18.91  | 29.13  |             |
|                               | Area              | 13.732 | 13.149 | 0.957       |
|                               | FWHM              | 0.453  | 0.428  |             |
| 15% BiVO <sub>4</sub> /UU-200 | Position (degree) | 18.95  | 29.04  |             |
|                               | Area              | 64.761 | 82.867 | 1.280       |
|                               | FWHM              | 0.417  | 0.285  |             |
| 25% BiVO <sub>4</sub> /UU-200 | Position (degree) | 18.90  | 29.01  |             |
|                               | Area              | 55.841 | 97.902 | 1.753       |
|                               | FWHM              | 0.396  | 0.279  |             |

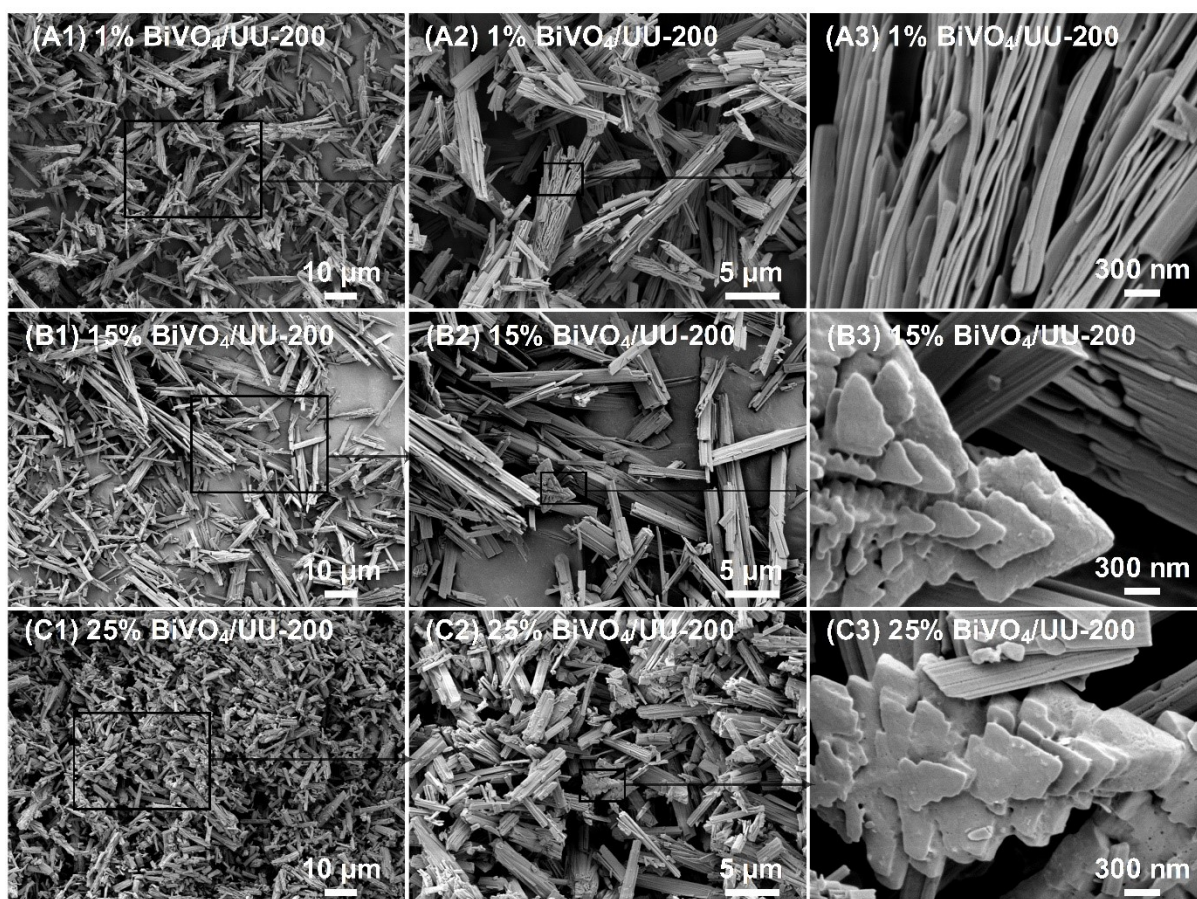

Figure S2. SEM images of 1% BiVO<sub>4</sub>/UU-200 (A1–A3), 15% BiVO<sub>4</sub>/UU-200 (B1–B3), and 25% BiVO<sub>4</sub>/UU-200 (C1–C3)

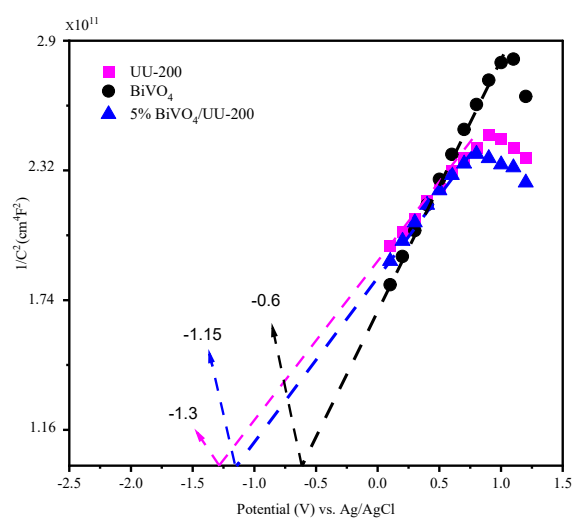

Figure S3. Mott–Schottky plots of BiVO<sub>4</sub>, UU-200 and 5% BiVO<sub>4</sub>/UU-200 composite.

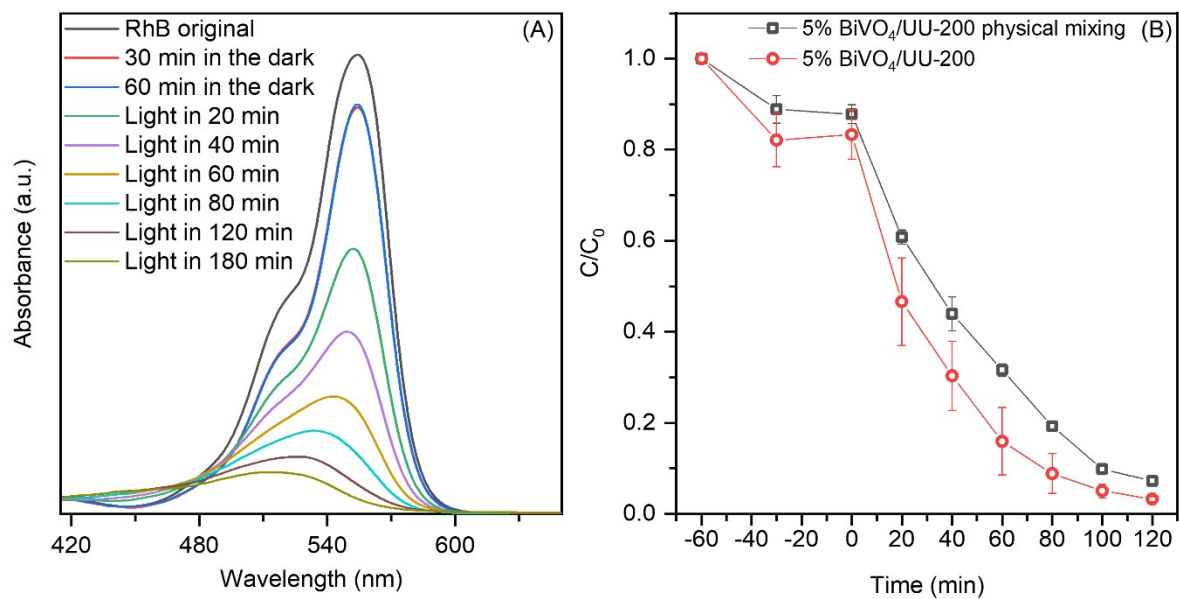

Figure S4. (A) Time courses of UV-vis absorption spectra of RhB over 5% BiVO<sub>4</sub>/UU-200; (B) Time courses of photocatalytic degradation of RhB over 5% BiVO<sub>4</sub>/UU-200 composites and 5% BiVO<sub>4</sub>/UU-200 physical mixing.

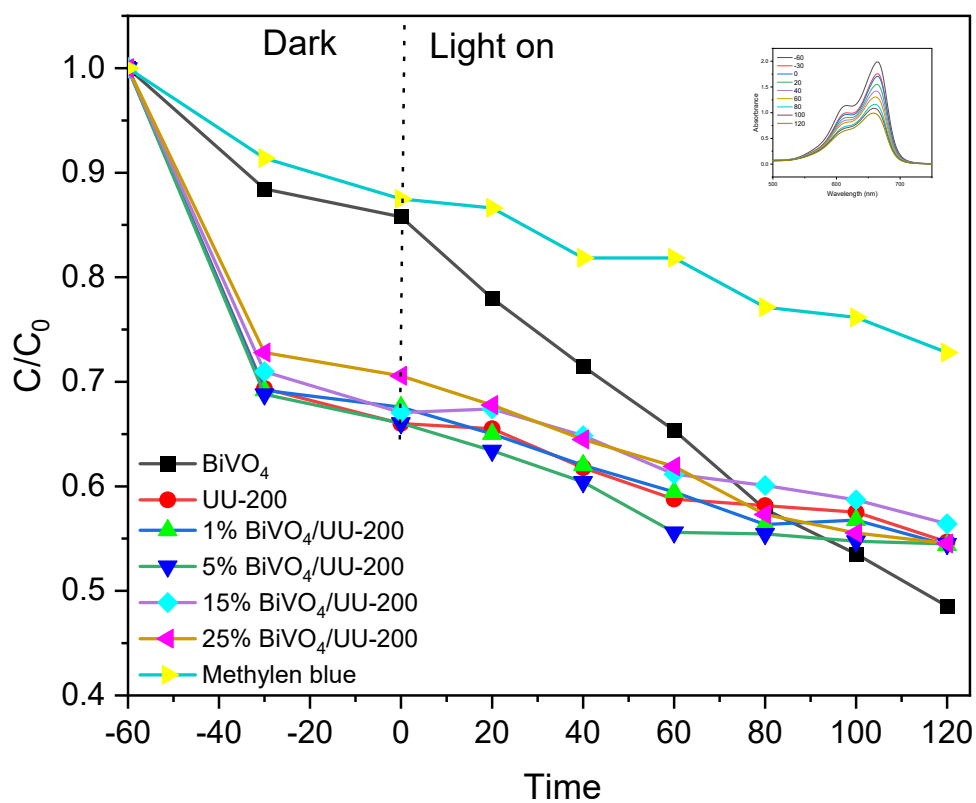

Figure S5. Photocatalytic degradation of Methylene Blue over  $\text{BiVO}_4/\text{UU-200}$  composites under dark and light irradiation.

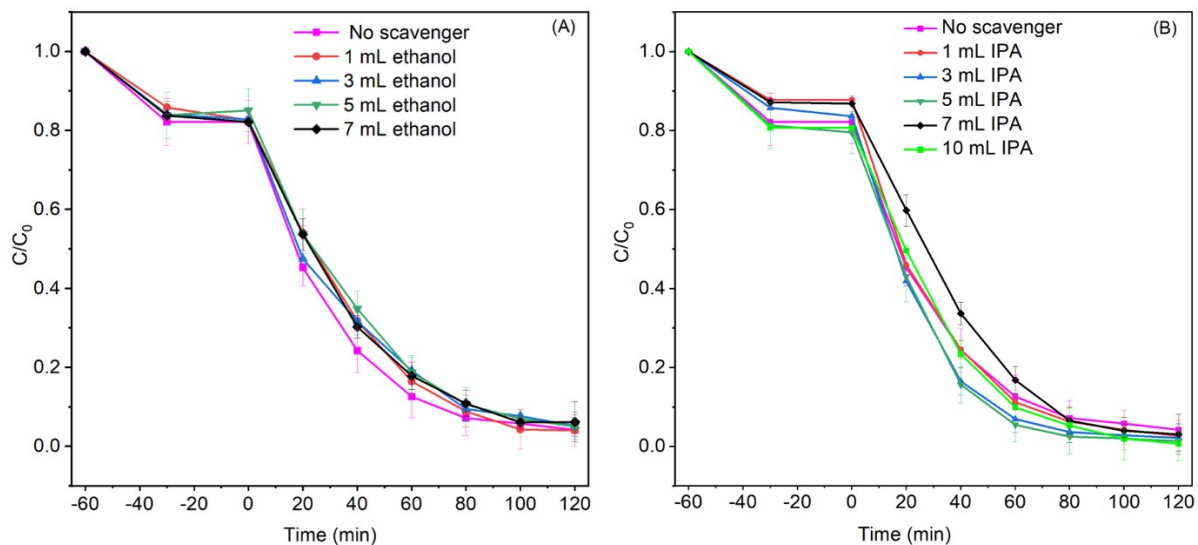

Figure S6. The effect of ethanol (A) and isopropanol (B) as  $\cdot\text{OH}$  scavengers on the degradation of RhB over the 5%  $\text{BiVO}_4/\text{UU-200}$  photocatalyst.

Table S2. Comparison of photodegradation performances of Bi-MOF-based composite photocatalysts

| Photocatalysts                | Contaminant | Light sources | Dosage ( $\text{g}\cdot\text{L}^{-1}$ ) | $C_0$ ( $\text{mg}\cdot\text{L}^{-1}$ ) | Time (min) | Degradation rates (%) | Ref.                 |
|-------------------------------|-------------|---------------|-----------------------------------------|-----------------------------------------|------------|-----------------------|----------------------|
| $\text{BiVO}_4/\text{UU-200}$ | RhB         | 40 W LED      | 0.1                                     | 15                                      | 120        | 96.8                  | This work            |
| $\text{BiBDC}/\text{BiVO}_4$  | TC          | 300 W Xenon   | 0.2                                     | 10                                      | 30         | 96.2                  | (Zhang et al., 2023) |
| $\text{BiVO}_4/\text{CAU-17}$ | RhB         | 300 W Xenon   | 1.0                                     | 10                                      | 60         | 99.3                  | (Zhou et al., 2024)  |

|                                         |     |             |      |    |    |      |                       |
|-----------------------------------------|-----|-------------|------|----|----|------|-----------------------|
| BiOCl/CAU-17                            | RhB | 40 W LED    | 0.15 | 15 | 60 | 96.0 | (Nguyen et al., 2024) |
| Bi <sub>2</sub> WO <sub>6</sub> /CAU-17 | RhB | 500 W Xenon | 0.4  | 10 | 60 | 80   | (Yang et al., 2021)   |
| Bi-MOF/BiOI                             | TC  | Xenon       | 1.0  | 40 | 60 | 77   | (Dai et al., 2023)    |
| BiOCl@Bi-MOF                            | CTC | 300 W Xenon | 0.5  | 50 | 90 | 75.8 | (Zhang et al., 2022)  |
| BiOBr/CAU-17                            | RhB | 500 W Xenon | 0.2  | 20 | 50 | 85.7 | (Zhu et al., 2017)    |

**Table S3.** Control experiments for photodegradation of RhB over the as-synthesized samples.

C and C<sub>0</sub> (in units of mol/L) denote the respective concentrations of RhB dye at time points t and 0, where t represents the current time, and 0 denotes the initial time.  $\sigma$  is the standard deviation calculated from 3 samples.

| Sample                              | Time<br>[min] | $C/C_0 \pm \sigma$ | $-\ln(C/C_0)^{(a)}$ | Sample                               | Time<br>[min] | $C/C_0 \pm \sigma$      | $-\ln(C/C_0)^{(a)}$ |
|-------------------------------------|---------------|--------------------|---------------------|--------------------------------------|---------------|-------------------------|---------------------|
| No<br>catalyst                      | -60           | 1±0                | --                  | BiVO <sub>4</sub>                    | -60           | 1±0                     | --                  |
|                                     | -30           | 0.99438±0.00197    | --                  |                                      | -30           | 0.96985±0.00658         | --                  |
|                                     | 0             | 0.99392±0.00226    | 0                   |                                      | 0             | 0.96439±0.000560<br>367 | 0                   |
|                                     | 20            | 0.99252±0.00378    | 8.56773E-4          |                                      | 20            | 0.96034±0.00785         | 0.00866             |
|                                     | 40            | 0.99167±0.00278    | 0.00139             |                                      | 40            | 0.95206±0.00304         | 0.01472             |
|                                     | 60            | 0.99114±0.00273    | 0.00281             |                                      | 60            | 0.94631±0.00179         | 0.02927             |
|                                     | 80            | 0.98973±0.00303    | 0.00258             |                                      | 80            | 0.93264±0.00775         | 0.04963             |
|                                     | 100           | 0.98996±0.00802    | 0.00805             |                                      | 100           | 0.91384±0.00501         | 0.08559             |
|                                     | 120           | 0.98456±0.00472    | 0.01048             |                                      | 120           | 0.88156±0.01343         | 0.09116             |
| UU-200                              | -60           | 1±0                | --                  | 1%<br>BiVO <sub>4</sub> /U<br>U-200  | -60           | 1±0                     | --                  |
|                                     | -30           | 0.86438±0.01798    | --                  |                                      | -30           | 0.90269±0.02483         | --                  |
|                                     | 0             | 0.84498±0.01242    | 0                   |                                      | 0             | 0.91373±0.02935         | 0                   |
|                                     | 20            | 0.62436±0.03735    | 0.31731             |                                      | 20            | 0.64731±0.04491         | 0.24783             |
|                                     | 40            | 0.4546±0.04305     | 0.78126             |                                      | 40            | 0.50522±0.03973         | 0.57529             |
|                                     | 60            | 0.28585±0.02348    | 1.10706             |                                      | 60            | 0.36414±0.01696         | 0.95903             |
|                                     | 80            | 0.20637±0.01674    | 1.64209             |                                      | 80            | 0.24809±0.00993         | 1.33709             |
|                                     | 100           | 0.12086±0.02043    | 2.09917             |                                      | 100           | 0.16999±0.0068          | 1.78617             |
|                                     | 120           | 0.07652±0.02206    | 2.821               |                                      | 120           | 0.10849±0.00267         | 2.4672              |
| 5%<br>BiVO <sub>4</sub> /U<br>U-200 | -60           | 1±0                | --                  | 15%<br>BiVO <sub>4</sub> /U<br>U-200 | -60           | 1±0                     | --                  |
|                                     | -30           | 0.79802±0.02601    | --                  |                                      | -30           | 0.86495±0.00571         | --                  |
|                                     | 0             | 0.817±0.01536      | 0                   |                                      | 0             | 0.86949±0.01319         | 0                   |
|                                     | 20            | 0.52961±0.03803    | 0.56003             |                                      | 20            | 0.52384±0.03338         | 0.28918             |
|                                     | 40            | 0.30251±0.02242    | 0.98711             |                                      | 40            | 0.39229±0.03086         | 0.61419             |
|                                     | 60            | 0.19736±0.02733    | 1.5565              |                                      | 60            | 0.28344±0.02323         | 1.14739             |
|                                     | 80            | 0.11168±0.0199     | 2.29265             |                                      | 80            | 0.1663±0.02061          | 1.58808             |
|                                     | 100           | 0.05349±0.01048    | 2.80266             |                                      | 100           | 0.10703±0.02865         | 2.11773             |
|                                     | 120           | 0.03212±0.00561    | 3.25595             |                                      | 120           | 0.06302±0.00876         | 2.3139              |
| 25%<br>BiVO <sub>4</sub> /U         | -60           | 1±0                | --                  | 5%<br>BiVO <sub>4</sub> /U<br>U-200  | -60           | 1±0                     | --                  |

|       |     |                 |         |                 |     |                |
|-------|-----|-----------------|---------|-----------------|-----|----------------|
| U-200 | -30 | 0.88431±0.00236 | --      | physical mixing | -30 | 0.889±0.0304   |
|       | 0   | 0.85692±0.02826 | 0       |                 | 0   | 0.878±0.0208   |
|       | 20  | 0.60211±0.0054  | 0.24605 |                 | 20  | 0.608±0.0154   |
|       | 40  | 0.47078±0.03151 | 0.59062 |                 | 40  | 0.439±0.0369   |
|       | 60  | 0.33356±0.03834 | 1.08787 |                 | 60  | 0.316±0.0139   |
|       | 80  | 0.20287±0.03779 | 1.62291 |                 | 80  | 0.193±0.00811  |
|       | 100 | 0.11881±0.02145 | 2.11851 |                 | 100 | 0.0978±0.00626 |
|       | 120 | 0.07238±0.01106 | 2.63476 |                 | 120 | 0.0718±0.00803 |

(a)  $C_0$  (in units of mol/L) denote the respective concentrations of RhB at time points  $t = 0$  min

**Table S4.** Effect of catalyst dosage on the degradation of RhB over the 5% BiVO<sub>4</sub>/UU-200 sample. C and C<sub>0</sub> (in units of mol/L) denote the respective concentrations of RhB dye at time points t and 0, where t represents the current time, and 0 denotes the initial time.

| Catalyst dosage | Time<br>[min] | C/C <sub>0</sub> | Sample    | Time<br>[min] | C/C <sub>0</sub> |
|-----------------|---------------|------------------|-----------|---------------|------------------|
| m = 5 mg        | 0             | 1                | m = 10 mg | 0             | 1                |
|                 | 20            | 0.986            |           | 20            | 0.748            |
|                 | 40            | 0.978            |           | 40            | 0.577            |
|                 | 60            | 0.908            |           | 60            | 0.397            |
|                 | 80            | 0.788            |           | 80            | 0.240            |
|                 | 100           | 0.684            |           | 100           | 0.141            |
|                 | 120           | 0.548            |           | 120           | 0.0702           |
| m = 15 mg       | 0             | 1                | m = 20 mg | 0             | 1                |
|                 | 20            | 0.776            |           | 20            | 0.698            |
|                 | 40            | 0.666            |           | 40            | 0.449            |
|                 | 60            | 0.354            |           | 60            | 0.243            |
|                 | 80            | 0.182            |           | 80            | 0.123            |
|                 | 100           | 0.0937           |           | 100           | 0.0576           |
|                 | 120           | 0.0371           |           | 120           | 0.0234           |

**Table S5.** Effect of initial RhB concentration on the degradation of RhB over the 5% BiVO<sub>4</sub>/UU-200 sample. C and C<sub>0</sub> (in units of mol/L) denote the respective concentrations of RhB dye at time points t and 0, where t represents the current time, and 0 denotes the initial time.

| RhB concentration | Time [min] | C/C <sub>0</sub> | Sample         | Time [min] | C/C <sub>0</sub> |
|-------------------|------------|------------------|----------------|------------|------------------|
| [RhB] = 15 ppm    | 0          | 1                | [RhB] = 20 ppm | 0          | 1                |
|                   | 20         | 0.643            |                | 20         | 0.731            |
|                   | 40         | 0.430            |                | 40         | 0.558            |
|                   | 60         | 0.254            |                | 60         | 0.341            |
|                   | 80         | 0.147            |                | 80         | 0.220            |
|                   | 100        | 0.0729           |                | 100        | 0.0998           |
|                   | 120        | 0.0377           |                | 120        | 0.0524           |
| [RhB] = 25 ppm    | 0          | 1                | [RhB] = 30 ppm | 0          | 1                |
|                   | 20         | 0.691            |                | 20         | 0.942            |
|                   | 40         | 0.522            |                | 40         | 0.813            |
|                   | 60         | 0.373            |                | 60         | 0.578            |
|                   | 80         | 0.249            |                | 80         | 0.325            |
|                   | 100        | 0.150            |                | 100        | 0.196            |
|                   | 120        | 0.0848           |                | 120        | 0.100            |
| [RhB] = 35 ppm    | 0          | 1                |                |            |                  |
|                   | 20         | 0.985            |                |            |                  |
|                   | 40         | 0.949            |                |            |                  |
|                   | 60         | 0.841            |                |            |                  |
|                   | 80         | 0.584            |                |            |                  |
|                   | 100        | 0.394            |                |            |                  |
|                   | 120        | 0.273            |                |            |                  |

**Table S6.** Effect of initial solution pH on the degradation of RhB over the 5% BiVO<sub>4</sub>/UU-200 sample. C and C<sub>0</sub> (in units of mol/L) denote the respective concentrations of RhB dye at time points t and 0, where t represents the current time, and 0 denotes the initial time.

| initial solution pH | Time [min] | C/C <sub>0</sub> | Sample | Time [min] | C/C <sub>0</sub> |
|---------------------|------------|------------------|--------|------------|------------------|
| pH 2                | 0          | 1                | pH 4   | 0          | 1                |
|                     | 20         | 0.298            |        | 20         | 0.874            |
|                     | 40         | 0.0283           |        | 40         | 0.691            |
|                     | 60         | 0.00353          |        | 60         | 0.534            |
|                     | 80         | 0.00199          |        | 80         | 0.357            |
|                     | 100        | 0.00202          |        | 100        | 0.187            |
|                     | 120        | 0.00106          |        | 120        | 0.0955           |
| pH 6                | 0          | 1                | pH8    | 0          | 1                |
|                     | 20         | 0.869            |        | 20         | 0.936            |
|                     | 40         | 0.717            |        | 40         | 0.856            |
|                     | 60         | 0.562            |        | 60         | 0.779            |
|                     | 80         | 0.463            |        | 80         | 0.726            |
|                     | 100        | 0.327            |        | 100        | 0.656            |
|                     | 120        | 0.259            |        | 120        | 0.624            |
| pH 10               | 0          | 1                |        |            |                  |
|                     | 20         | 1.006            |        |            |                  |
|                     | 40         | 1.000            |        |            |                  |
|                     | 60         | 1.002            |        |            |                  |
|                     | 80         | 0.997            |        |            |                  |
|                     | 100        | 0.997            |        |            |                  |
|                     | 120        | 1.000            |        |            |                  |

**Table S7.** Active species trapping experiments for photodegradation of RhB over 5% BiVO<sub>4</sub>/UU-200 sample. C and C<sub>0</sub> (in units of mol/L) denote the respective concentrations of RhB and TCH at time points t and 0, where t represents the current time, and 0 denotes the initial time.  $\sigma$  is the standard deviation calculated from 3 samples.

| Scavenger                                     | Time [min] | C/C <sub>0</sub> ± $\sigma$ | Scavenger                                     | Time [min] | C/C <sub>0</sub> ± $\sigma$ |
|-----------------------------------------------|------------|-----------------------------|-----------------------------------------------|------------|-----------------------------|
| IPA                                           | -60        | 1±0                         | BQ                                            | -60        | 1±0                         |
|                                               | -30        | 0.981±0.00724               |                                               | -30        | 0.987±0.00319               |
|                                               | 0          | 0.986±0.000756              |                                               | 0          | 0.985±0.00579               |
|                                               | 20         | 0.852±0.0399                |                                               | 20         | 0.973±0.00637               |
|                                               | 40         | 0.617±0.0283                |                                               | 40         | 0.968±0.00992               |
|                                               | 60         | 0.361±0.0343                |                                               | 60         | 0.965±0.0129                |
|                                               | 80         | 0.218±0.0334                |                                               | 80         | 0.961±0.0129                |
|                                               | 100        | 0.126±0.0160                |                                               | 100        | 0.961±0.0119                |
|                                               | 120        | 0.0560±0.00577              |                                               | 120        | 0.956±0.0120                |
| Na <sub>2</sub> C <sub>2</sub> O <sub>4</sub> | -60        | 1±0                         | K <sub>2</sub> Cr <sub>2</sub> O <sub>7</sub> | -60        | 1±0                         |
|                                               | -30        | 0.987±0.00223               |                                               | -30        | 0.980±0.0170                |
|                                               | 0          | 0.989±0.00571               |                                               | 0          | 0.981±0.0103                |
|                                               | 20         | 0.928±0.0122                |                                               | 20         | 0.907±0.0168                |
|                                               | 40         | 0.786±0.0336                |                                               | 40         | 0.855±0.0237                |
|                                               | 60         | 0.626±0.0337                |                                               | 60         | 0.771±0.0197                |
|                                               | 80         | 0.521±0.0269                |                                               | 80         | 0.706±0.0400                |
|                                               | 100        | 0.410±0.00243               |                                               | 100        | 0.629±0.0507                |
|                                               | 120        | 0.257±0.0155                |                                               | 120        | 0.581±0.0526                |

**Table S8.** Recycling runs for photodegradation of RhB over 5% BiVO<sub>4</sub>/UU-200 sample. C and C<sub>0</sub> (in units of mol/L) denote the respective concentrations of RhB dye at time points t and 0, where t represents the current time, and 0 denotes the initial time.  $\sigma$  is the standard deviation calculated from 3 samples.

| Cycle run | Time [min] | C/C <sub>0</sub> ± $\sigma$ | Cycle run | Time [min] | C/C <sub>0</sub> ± $\sigma$ |
|-----------|------------|-----------------------------|-----------|------------|-----------------------------|
| Cycle 1   | -60        | 1±0                         | Cycle 2   | -60        | 1±0                         |
|           | -30        | 0.867±0.00958               |           | -30        | 0.951±0.0153                |
|           | 0          | 0.880±0.0152                |           | 0          | 0.950±0.0158                |
|           | 20         | 0.608±0.107                 |           | 20         | 0.743±0.0231                |
|           | 40         | 0.459±0.0713                |           | 40         | 0.637±0.00360               |
|           | 60         | 0.328±0.0630                |           | 60         | 0.521±0.0290                |
|           | 80         | 0.219±0.0674                |           | 80         | 0.392±0.0192                |
|           | 100        | 0.132±0.0487                |           | 100        | 0.227±0.0384                |
|           | 120        | 0.0746±0.0196               |           | 120        | 0.0946±0.0171               |
| Cycle 3   | -60        | 1±0                         |           |            |                             |
|           | -30        | 0.969±0.0148                |           |            |                             |
|           | 0          | 0.974±0.0172                |           |            |                             |
|           | 20         | 0.844±0.0110                |           |            |                             |
|           | 40         | 0.706±0.0120                |           |            |                             |
|           | 60         | 0.556±0.0280                |           |            |                             |
|           | 80         | 0.406±0.0212                |           |            |                             |
|           | 100        | 0.311±0.0255                |           |            |                             |
|           | 120        | 0.1423±0.00512              |           |            |                             |

## REFERENCES

- Dai, D., Qiu, J., Xia, G., Tang, Y., Wu, Z., Yao, J., 2023. Competitive coordination initiated one-pot synthesis of core-shell Bi-MOF@BiOX (X = I, Br and Cl) heterostructures for photocatalytic elimination of mixed pollutants. *Sep Purif Technol* 316, 123819. <https://doi.org/10.1016/j.seppur.2023.123819>
- Nguyen, V.H., Pham, H.A. Le, Lee, T., Nguyen, T.D., 2024. Synthesis of a 3D Flower-Like BiOCl/Bi-MOF Heterostructure for High-Performance Removal of Rhodamine B and Tetracycline Hydrochloride. *Inorg Chem* 63, 12027–12041. <https://doi.org/10.1021/acs.inorgchem.4c00877>
- Yang, L., Xin, Y., Yao, C., Miao, Y., 2021. In situ preparation of Bi<sub>2</sub>WO<sub>6</sub>/CAU-17 photocatalyst with excellent photocatalytic activity for dye degradation. *Journal of Materials Science: Materials in Electronics* 32, 13382–13395. <https://doi.org/10.1007/s10854-021-05917-3>
- Zhang, B., Xu, H., Wang, M., Su, L., Wu, C., Wang, Q., 2023. Construction of a novel Bi-MOF/BiVO<sub>4</sub> heterojunction with enhanced visible light photocatalytic performance. *J Environ Chem Eng* 11, 110417. <https://doi.org/10.1016/j.jece.2023.110417>
- Zhang, Y., Ma, F., Ling, M., Zheng, H., Wu, Y., Li, L., 2022. In-Situ Constructed Indirect Z-Type Heterojunction By Plasma Bi and Bi<sub>2</sub>O<sub>3</sub>-Bi<sub>2</sub>O<sub>2</sub>CO<sub>3</sub> Co-Modified with BiOCl@Bi-Mof for Enhanced Photocatalytic Efficiency Toward Antibiotics. *SSRN Electronic Journal*. <https://doi.org/10.2139/ssrn.4268874>
- Zhou, T., Liu, J., Zhan, H., Wang, P., Chao, K., Chen, M., Zheng, J., Fu, B., 2024. Facile preparation of BiVO<sub>4</sub>/Bi-MOF composites for photocatalytic dye removal. *Journal of Physics and Chemistry of Solids* 188, 111917. <https://doi.org/10.1016/j.jpcs.2024.111917>
- Zhu, S.-R., Wu, M.-K., Zhao, W.-N., Liu, P.-F., Yi, F.-Y., Li, G.-C., Tao, K., Han, L., 2017. In Situ Growth of Metal–Organic Framework on BiOBr 2D Material with Excellent Photocatalytic Activity for Dye Degradation. *Cryst Growth Des* 17, 2309–2313. <https://doi.org/10.1021/acs.cgd.6b01811>
